# Supplementary material for: Mapping each pre-existing condition’s association to short-term and long-term COVID-19 complications
Source: PubMed Central journal article supplement (PMC8316410; doi:10.1038/s41746-021-00484-7), 2021-07-27
Supplement: 41746_2021_484_MOESM1_ESM.pdf [file 41746_2021_484_MOESM1_ESM.pdf]

# Supplementary Material

**Supplementary Figure 1: Distribution of the number of clinical notes per patient in the Mayo Clinic EHR dataset.** In this histogram, we show the number of notes per patient for the 1,803 patients in the study population along with the propensity matched controls. For each patient, we add up the number of notes that are present in the Mayo Clinic Health System EHR dataset from the beginning of their electronic health record to September 15, 2020. The summary statistics for the distribution of clinical notes are: (mean: 567, standard deviation: 861, 25th percentile: 44, 50th percentile: 260, 75th percentile: 737, min: 0, max: 10,472).

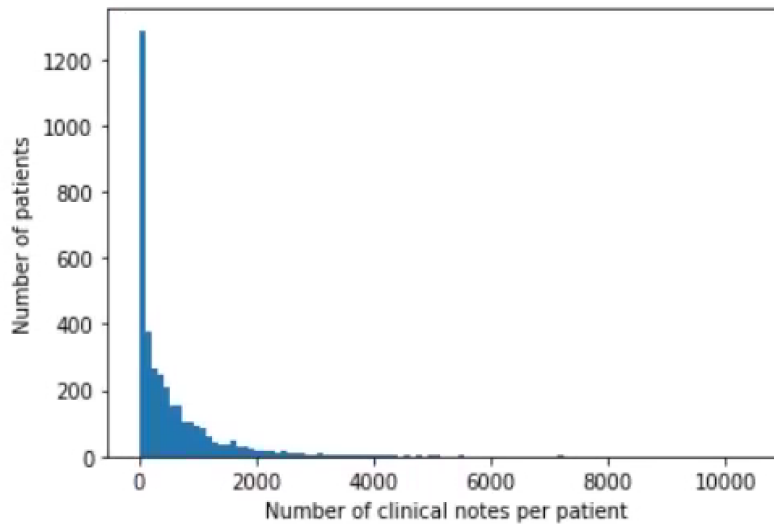

**Supplementary Table 1: Rates of early onset complications stratified by comorbidity** In each row, we compare the rates of “early onset” complications in cohorts of COVID-19 patients with and without comorbidities, during the time period (Days 0-30) relative to the PCR diagnosis date. To calculate the rates of new onset complications, the numerator is the number of patients with the complication recorded in the clinical notes with positive sentiment during but not prior to the time period. The denominator is the number of patients without the complication recorded in the clinical notes with positive sentiment prior to the time period. Rows with cardiovascular complications are highlighted in **light red**, and rows with respiratory complications are highlighted in **light blue**. Rows are sorted first by complication, and second by statistical significance. The columns are: **(1) Complication:** Complication phenotype that is used to define the rates, including phenotypes associated with severe COVID-19 disease, **(2) Comorbidity:** Comorbidity that defines the cohorts, including chronic conditions which are risk factors for severe COVID-19 disease, **(3) Rate of new onset complication in cohort with the comorbidity:** Rate of complication from Days 0-30 in the cohort of patients with the comorbidity. **(4) Rate of new onset complication in cohort without the comorbidity:** Rate of complication from Days 0-30 in the cohort of patients without the comorbidity, **(5) Relative risk [95% C.I.]:** (Rate of complication in cohort with comorbidity) / (Rate of complication in cohort without comorbidity), along with the associated 95% confidence interval, **(6) BH-adjusted p-value:** Benjamin-Hochberg corrected p-value for the Fisher exact statistical significance test comparing the rates of the specified complications in the cohorts of patients with and without the specified comorbidity.

| Complication                                            | Comorbidity                           | Rate of new onset complication in cohort with the Comorbidity | Rate of new onset complication in cohort without the Comorbidity | Relative Risk [95% CI] | BH-adjusted p-value |
|---------------------------------------------------------|---------------------------------------|---------------------------------------------------------------|------------------------------------------------------------------|------------------------|---------------------|
| Acute respiratory distress syndrome / Acute lung injury | Hypertension                          | 27/500 (5.4%)                                                 | 8/1303 (0.61%)                                                   | 8.8 (3.9, 18)          | 1.8E-07             |
| Acute respiratory distress syndrome / Acute lung injury | Chronic obstructive pulmonary disease | 9/93 (9.7%)                                                   | 26/1710 (1.5%)                                                   | 6.4 (3.2, 13)          | 1.4E-03             |
| Acute respiratory distress syndrome / Acute lung injury | Heart failure                         | 10/139 (7.2%)                                                 | 25/1664 (1.5%)                                                   | 4.8 (2.4, 9.8)         | 4.4E-03             |
| Acute respiratory distress syndrome / Acute lung injury | Chronic kidney disease                | 11/233 (4.7%)                                                 | 24/1570 (1.5%)                                                   | 3.1 (1.6, 6.3)         | 0.04                |
| Acute kidney injury                                     | Hypertension                          | 28/500 (5.6%)                                                 | 12/1303 (0.92%)                                                  | 6.1 (3.1, 11)          | 2.4E-06             |
| Acute kidney injury                                     | Chronic kidney disease                | 16/233 (6.9%)                                                 | 24/1570 (1.5%)                                                   | 4.5 (2.5, 8.3)         | 5.6E-04             |
| Acute kidney injury                                     | Obesity                               | 12/227 (5.3%)                                                 | 28/1576 (1.8%)                                                   | 3 (1.6, 5.8)           | 0.03                |
| Anemia                                                  | Hypertension                          | 19/500 (3.8%)                                                 | 7/1303 (0.54%)                                                   | 7.1 (2.9, 16)          | 9.6E-05             |

|                     |                                       |               |                 |                  |         |
|---------------------|---------------------------------------|---------------|-----------------|------------------|---------|
| Cardiac arrhythmias | Hypertension                          | 44/500 (8.8%) | 13/1303 (1%)    | 8.8 (4.7, 16)    | 1.8E-12 |
| Cardiac arrhythmias | Chronic kidney disease                | 19/233 (8.2%) | 38/1570 (2.4%)  | 3.4 (2, 5.8)     | 1.4E-03 |
| Cardiac arrhythmias | Anemia                                | 18/270 (6.7%) | 39/1533 (2.5%)  | 2.6 (1.5, 4.5)   | 0.02    |
| Cardiac arrhythmias | Type 2 diabetes mellitus              | 17/278 (6.1%) | 40/1525 (2.6%)  | 2.3 (1.4, 4.1)   | 0.05    |
| Heart failure       | Hypertension                          | 26/500 (5.2%) | 12/1303 (0.92%) | 5.6 (2.8, 11)    | 1.0E-05 |
| Heart failure       | Cancer                                | 14/254 (5.5%) | 24/1549 (1.5%)  | 3.6 (1.9, 6.8)   | 7.2E-03 |
| Hyperglycemia       | Hypertension                          | 26/500 (5.2%) | 10/1303 (0.77%) | 6.8 (3.2, 13)    | 2.4E-06 |
| Hyperglycemia       | Type 2 diabetes mellitus              | 14/278 (5%)   | 22/1525 (1.4%)  | 3.5 (1.8, 6.7)   | 9.5E-03 |
| Hyperglycemia       | Cancer                                | 12/254 (4.7%) | 24/1549 (1.5%)  | 3 (1.6, 6.1)     | 0.03    |
| Hyperglycemia       | Chronic kidney disease                | 11/233 (4.7%) | 25/1570 (1.6%)  | 3 (1.5, 6)       | 0.05    |
| Hypertension        | Hypertension                          | 0/500 (0%)    | 28/1303 (2.1%)  | 0 (0.0028, 0.75) | 3.9E-03 |
| Hypertension        | Hyperglycemia                         | 7/120 (5.8%)  | 21/1683 (1.2%)  | 4.7 (2.2, 11)    | 0.03    |
| Hypertension        | Heart failure                         | 7/139 (5%)    | 21/1664 (1.3%)  | 4 (1.8, 9.4)     | 0.05    |
| Pleural effusion    | Type 2 diabetes mellitus              | 15/278 (5.4%) | 16/1525 (1%)    | 5.1 (2.6, 10)    | 5.6E-04 |
| Pleural effusion    | Obesity                               | 13/227 (5.7%) | 18/1576 (1.1%)  | 5 (2.5, 10)      | 1.4E-03 |
| Pleural effusion    | Hypertension                          | 19/500 (3.8%) | 12/1303 (0.92%) | 4.1 (2, 8.2)     | 3.3E-03 |
| Pleural effusion    | Heart failure                         | 9/139 (6.5%)  | 22/1664 (1.3%)  | 4.9 (2.4, 11)    | 7.2E-03 |
| Pleural effusion    | Chronic obstructive pulmonary disease | 7/93 (7.5%)   | 24/1710 (1.4%)  | 5.4 (2.5, 12)    | 0.01    |
| Pleural effusion    | Anemia                                | 12/270 (4.4%) | 19/1533 (1.2%)  | 3.6 (1.8, 7.3)   | 0.02    |
| Pleural effusion    | Coronary Artery Disease               | 7/111 (6.3%)  | 24/1692 (1.4%)  | 4.4 (2.1, 10)    | 0.03    |
| Pulmonary embolism  | Anemia                                | 8/270 (3%)    | 6/1533 (0.39%)  | 7.6 (2.7, 20)    | 6.9E-03 |
| Pulmonary embolism  | Cancer                                | 7/254 (2.8%)  | 7/1549 (0.45%)  | 6.1 (2.2, 17)    | 0.02    |
| Respiratory failure | Hypertension                          | 33/500 (6.6%) | 11/1303 (0.84%) | 7.8 (3.9, 15)    | 1.3E-08 |
| Respiratory failure | Heart failure                         | 13/139 (9.4%) | 31/1664 (1.9%)  | 5 (2.8, 9.4)     | 5.6E-04 |

|                              |                                       |               |                 |                |         |
|------------------------------|---------------------------------------|---------------|-----------------|----------------|---------|
| Respiratory failure          | Chronic obstructive pulmonary disease | 10/93 (11%)   | 34/1710 (2%)    | 5.4 (2.9, 11)  | 1.4E-03 |
| Respiratory failure          | Anemia                                | 17/270 (6.3%) | 27/1533 (1.8%)  | 3.6 (2, 6.5)   | 2.5E-03 |
| Respiratory failure          | Obesity                               | 14/227 (6.2%) | 30/1576 (1.9%)  | 3.2 (1.8, 6)   | 0.01    |
| Respiratory failure          | Chronic kidney disease                | 14/233 (6%)   | 30/1570 (1.9%)  | 3.1 (1.7, 5.9) | 0.01    |
| Respiratory failure          | Type 2 diabetes mellitus              | 15/278 (5.4%) | 29/1525 (1.9%)  | 2.8 (1.6, 5.2) | 0.03    |
| Respiratory failure          | Obstructive sleep apnea               | 9/133 (6.8%)  | 35/1670 (2.1%)  | 3.2 (1.7, 6.7) | 0.04    |
| Respiratory failure          | Coronary Artery Disease               | 8/111 (7.2%)  | 36/1692 (2.1%)  | 3.4 (1.7, 7.2) | 0.05    |
| Sepsis                       | Hypertension                          | 18/500 (3.6%) | 3/1303 (0.23%)  | 16 (4.4, 43)   | 3.1E-06 |
| Sepsis                       | Cancer                                | 9/254 (3.5%)  | 12/1549 (0.77%) | 4.6 (2, 11)    | 0.02    |
| Sepsis                       | Anemia                                | 9/270 (3.3%)  | 12/1533 (0.78%) | 4.3 (1.9, 9.9) | 0.03    |
| Septic shock                 | Hypertension                          | 7/500 (1.4%)  | 2/1303 (0.15%)  | 9.1 (1.9, 33)  | 0.03    |
| Venous thromboembolism / DVT | Anemia                                | 7/270 (2.6%)  | 7/1533 (0.46%)  | 5.7 (2.1, 15)  | 0.03    |
| Venous thromboembolism / DVT | Hypertension                          | 9/500 (1.8%)  | 5/1303 (0.38%)  | 4.7 (1.6, 13)  | 0.05    |
| Venous thromboembolism / DVT | Obesity                               | 6/227 (2.6%)  | 8/1576 (0.51%)  | 5.2 (1.9, 15)  | 0.05    |

**Supplementary Table 2: Sentence-level validation of BERT model to classify phenotype sentiment.** The columns are **(1) Phenotype:** disease token identified in the sentence, **(2) TP (true positives):** count of sentences in which the BERT model correctly identified the sentiment as 'Yes', **(3) TN (true negatives):** count of sentences in which the BERT model correctly identified the sentiment as not 'Yes', **(4) FP (false positives):** count of sentences in which the BERT model incorrectly identified the sentiment as 'Yes', **(5) FN: (false negatives):** count of sentences in which the BERT model incorrectly identified the sentiment as not 'Yes', **(6) Precision:** precision of the BERT model, equal to  $TP/(TP+FP)$ , **(7) Recall:** recall of the BERT model, equal to  $TP/(TP+FN)$ , **(8) Accuracy:** accuracy of the BERT model, equal to  $(TP+TN)/(TP+TN+FP+FN)$ .

| Phenotype                                               | TP  | FP | FN | TN | Precision | Recall | Accuracy |
|---------------------------------------------------------|-----|----|----|----|-----------|--------|----------|
| Acute kidney injury                                     | 93  | 3  | 2  | 0  | 0.969     | 0.979  | 0.949    |
| Anemia                                                  | 97  | 5  | 1  | 5  | 0.951     | 0.99   | 0.945    |
| Acute respiratory distress syndrome / acute lung injury | 98  | 0  | 1  | 4  | 1         | 0.99   | 0.991    |
| Asthma                                                  | 89  | 3  | 1  | 11 | 0.968     | 0.989  | 0.962    |
| Cancer                                                  | 80  | 1  | 5  | 19 | 0.988     | 0.942  | 0.943    |
| Cardiac arrest                                          | 63  | 1  | 10 | 4  | 0.985     | 0.864  | 0.859    |
| Cardiac arrhythmias                                     | 96  | 0  | 1  | 6  | 1         | 0.99   | 0.991    |
| Chronic kidney disease                                  | 104 | 5  | 0  | 0  | 0.955     | 1      | 0.955    |
| Chronic obstructive pulmonary disease                   | 1   | 0  | 0  | 0  | 1         | 1      | 1        |
| Disseminated intravascular coagulation                  | 18  | 2  | 6  | 50 | 0.9       | 0.75   | 0.895    |
| Heart failure                                           | 90  | 4  | 1  | 9  | 0.958     | 0.99   | 0.952    |
| Hyperglycemia                                           | 96  | 2  | 1  | 12 | 0.98      | 0.99   | 0.973    |
| Hypertension                                            | 99  | 1  | 1  | 3  | 0.99      | 0.99   | 0.981    |
| Myocardial infarction                                   | 85  | 0  | 1  | 14 | 1         | 0.989  | 0.99     |
| Obesity                                                 | 98  | 0  | 2  | 0  | 1         | 0.98   | 0.98     |
| Obstructive sleep apnea                                 | 92  | 1  | 0  | 7  | 0.99      | 1      | 0.99     |

|                                               |             |           |           |            |              |              |              |
|-----------------------------------------------|-------------|-----------|-----------|------------|--------------|--------------|--------------|
| Pleural effusion                              | 56          | 0         | 1         | 28         | 1            | 0.983        | 0.989        |
| Pulmonary embolism                            | 50          | 1         | 2         | 46         | 0.981        | 0.962        | 0.97         |
| Respiratory failure                           | 111         | 0         | 0         | 0          | 1            | 1            | 1            |
| Sepsis                                        | 95          | 7         | 1         | 18         | 0.932        | 0.99         | 0.934        |
| Septic shock                                  | 80          | 1         | 0         | 8          | 0.988        | 1            | 0.989        |
| Stroke / Cerebrovascular incident             | 81          | 1         | 0         | 12         | 0.988        | 1            | 0.99         |
| Type 1 diabetes mellitus                      | 93          | 3         | 0         | 1          | 0.969        | 1            | 0.97         |
| Type 2 diabetes mellitus                      | 106         | 0         | 0         | 1          | 1            | 1            | 1            |
| Venous thromboembolism / deep vein thrombosis | 79          | 2         | 2         | 14         | 0.976        | 0.976        | 0.959        |
| <b>Overall</b>                                | <b>2050</b> | <b>43</b> | <b>39</b> | <b>272</b> | <b>0.980</b> | <b>0.982</b> | <b>0.966</b> |
